# INFOGRAPHICS IN ANESTHESIOLOGY

Complex Information for Anesthesiologists Presented Quickly and Clearly

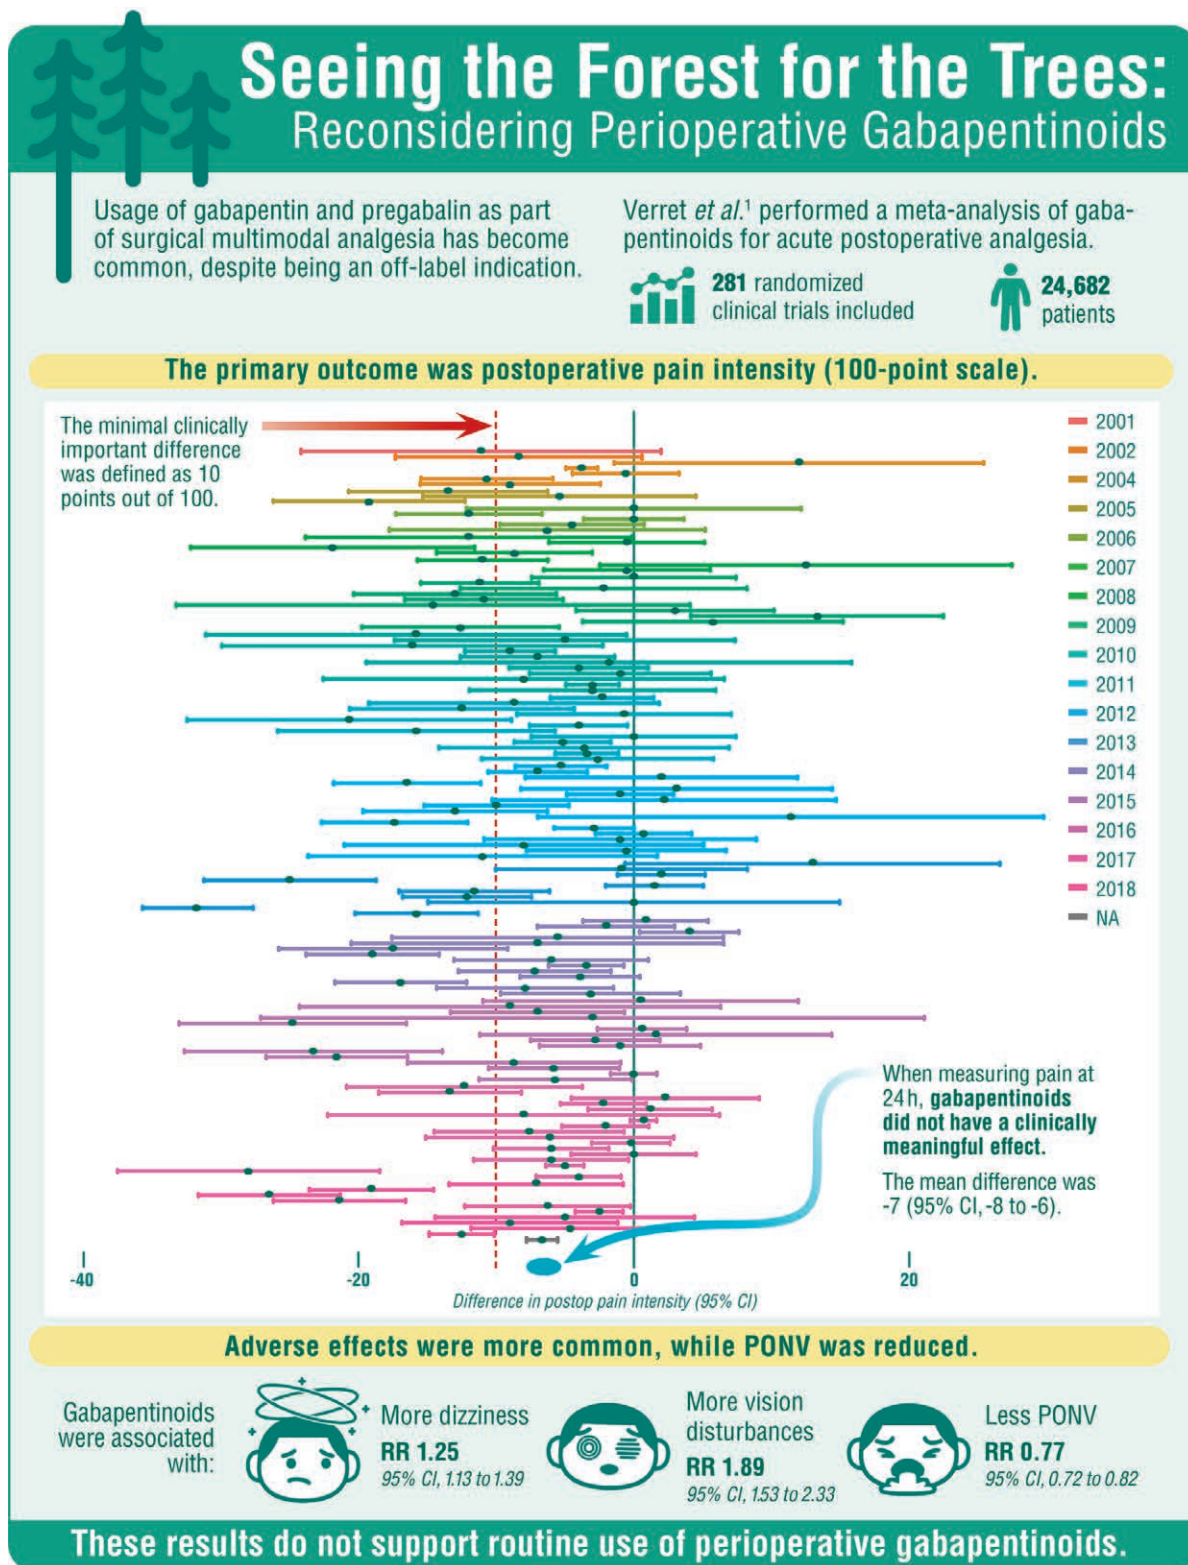

Downloaded from <http://esa2.silverchair.com/anesthesiology/article-pdf/133/2/A17514502/20200800-0-00005.pdf> by guest on 20 April 2024

PONV, postoperative nausea and vomiting; RR, risk ratio.

Infographic created by Jonathan P. Wanderer, Vanderbilt University Medical Center, and James P. Rathmell, Brigham and Women's Health Care/Harvard Medical School. Illustration by Annemarie Johnson, Vivo Visuals. Address correspondence to Dr. Wanderer: [jon.wanderer@vumc.org](mailto:jon.wanderer@vumc.org).

1. Verret M, Lauzier F, Zarychanski R, Perron C, Savard X, Pinar A-M, Leblanc G, Cossi M-J, Neveu X, Turgeon AF, Canadian Perioperative Anesthesia Clinical Trials (PACT) Group: Perioperative use of gabapentinoids for the management of postoperative acute pain: A systematic review and meta-analysis. *ANESTHESIOLOGY* 2020; 133:265–79
